# Supplementary material for: A facile synthesis of anatase N,B codoped TiO2 anodes for improved-performance dye-sensitized solar cells
Source: Royal Society of Chemistry journal article supplement (doi:10.1039/c1jm10853k), 2011-01-01
Supplement: c1jm10853k.pdf [file c1jm10853k.pdf]

## **A facile synthesis of anatase N,B codoped TiO<sub>2</sub> Anodes for Improved-Performance Dye-Sensitized Solar Cells**

**Huajun Tian, Linhua Hu, Wenxin Li, Jiang Sheng , Shuangying Xu and  
Songyuan Dai\***

Key Lab of Novel Thin Film Solar Cells, Institute of Plasma Physics, Chinese Academy of Sciences, P.O. Box, 1126, Hefei, Anhui 230031, People's Republic of China,

\* Corresponding author: Songyuan Dai, E-mail: [sydai@ipp.ac.cn](mailto:sydai@ipp.ac.cn)

### **Supplementary Figure & Table:**

#### **Experimental details**

**Preparation of the N,B codoped TiO<sub>2</sub>:** The undoped and N,B codoped TiO<sub>2</sub> were prepared by modified sol-gel method. For N,B codoped TiO<sub>2</sub> sample, Titanium isopropoxide (Fluka) was added drop by drop (2 mL/min) to 90 ml deionized water with the mixture of DD-water, H<sub>3</sub>BO<sub>3</sub> and CO(NH<sub>2</sub>)<sub>2</sub> at room temperature under vigorous stirring for 3-5 h. The formed precipitate solution, which were prepared by adding different amount of boric acid and urea(TiO<sub>2</sub>: urea =20/7, 4/1, weight ratio), were washed and collected with deionized water thoroughly, then stirred for 10 h at 80 °C to formed transparent sol and heated at 200 °C in autoclave for 12 h to obtain gelatin which was added polyethylene glycol (PEG, molecular weight of 20 000, Aldrich) and terpeneol (Fluka) to form the TiO<sub>2</sub> paste(N,B codoped-1(0.43 at.% N,

0.51 at.% B), N,B codoped-2). The whole process was under vigorous stirring. The preparation method for undoped sample was the same as above with the addition of precursors as required.

#### **Assembly of DSCs:**

N,B codoped and undoped photocathodes were fabricated by screen-printing technique using the our group's published procedures to achieve TiO<sub>2</sub> film thicknesses of **13.4** μm, **13.0**μm and **12.8** μm, respectively.<sup>S1</sup> The N,B codoped and undoped photocathodes were immersed in an 0.5mM ethanol solution of dye N719 [cis-dithiocyanate-N,N'-bis-(4-carboxylate-4'-tetrabutylammonium-carboxylate-2,2'-ipyridine) ruthenium(II)] at room temperature for 12h. Liquid-junction solar cells were prepared by infiltrating the dye-coated TiO<sub>2</sub> electrode with redox electrolyte containing 0.1 mol·L<sup>-1</sup> lithium iodide anhydrous, 0.1 mol·L<sup>-1</sup> iodine, 0.6mol·L<sup>-1</sup> 1, 2-dimethyl-3-propylimidazolium iodide, 0.5 mol·L<sup>-1</sup> 4-tertbutylpyridine in acetonitrile. The effective cell area was 0.25 cm<sup>2</sup>.

#### **Characterization:**

The particle morphology of undoped and N,B codoped electrodes microstructure were observed using a field emission scanning electron microscope (FE-SEM, sirion200, FEI Corp., Holland). Crystallite sizes, phases, and shapes were observed with transmission electron microscopy (TEM) and high-resolution transmission electron microscopy (HRTEM) (TEM, JEOL-2010,Japan). The crystallinity of undoped and N,B codoped films were determined using X-ray diffraction analysis (XRD, TTR-III,

Rigaku Corp., Japan) measurement with Cu K $\alpha$  ( $\lambda=0.1541$  nm). The crystallite size  $D$  was calculated by the Sherrer equation. The photocurrent density-photovoltage (J-V) characteristics of DSCs with an active area of  $0.25$  cm $^2$  were measured under an illumination of AM 1.5 ( $100$  mW cm $^{-2}$ ) which was realized on a solar simulator (Oriel Sol 3A, USA) with a Keithley 2420 source meter(Keithley, USA), calibrated with a NREL-certified silicon solar cell. The UV-vis spectrum was performed on a UV-vis spectrophotometer (TU-1901, PGeneral Instrument Inc., China). The flatband potential ( $V_{fb}$ ) of the nanostructure TiO $_2$  electrode was performed by measuring absorbance at  $780$  nm as a function of the applied potential.<sup>S2</sup> For spectroscopic electrochemistry measurement,  $4$   $\mu$ m-thick TiO $_2$  film formed the working electrode ( $2$ cm $^2$  surface area) of a three-electrode photoelectrochemical cell employing a platinum wire counter electrode and an Ag/AgCl reference electrode. Potential control was carried out on a CHI 660A potentiostat, and the applied potential being scanned at  $5$  mV/s. A  $780$  nm monochromatic light source was obtained from UV-Vis spectrophotometer (TU-1901, PGeneral Instrument Inc., China). The incident-phototo-current efficiency (IPCE) of the DSC was measured using a  $300$ W Xe lamp light source with monochromatic light (Oriel Instrument, USA). For each determination of  $V_{fb}$ , a new working electrode and freshly prepared electrolyte solution were used. Impedance measurements were carried out with an IM6ex electrochemical workstation (Zahner-Elektrick, Germany) in the frequency range of  $10$  mHz- $1000$ kHz at room temperature. The working electrode was a dyed TiO $_2$  electrode of DSC, and the auxiliary electrode and the reference electrode were a

platinized counter electrode of DSC. The amplitude of the alternative signal was 5mV.

**References:**

- [S1]. H.J.Tian, L.H.Hu, C.N.Zhang, W.Q.Liu, Y.Huang, L.Guo, J.Sheng, S.Y.Dai, *J. Phys. Chem. C*, 2010, **114**, 1627-1632.
- [S2]. G. Redmond, D. Fitzmaurice, *J. Phys. Chem.* **1993**, 97, 1426–1430.

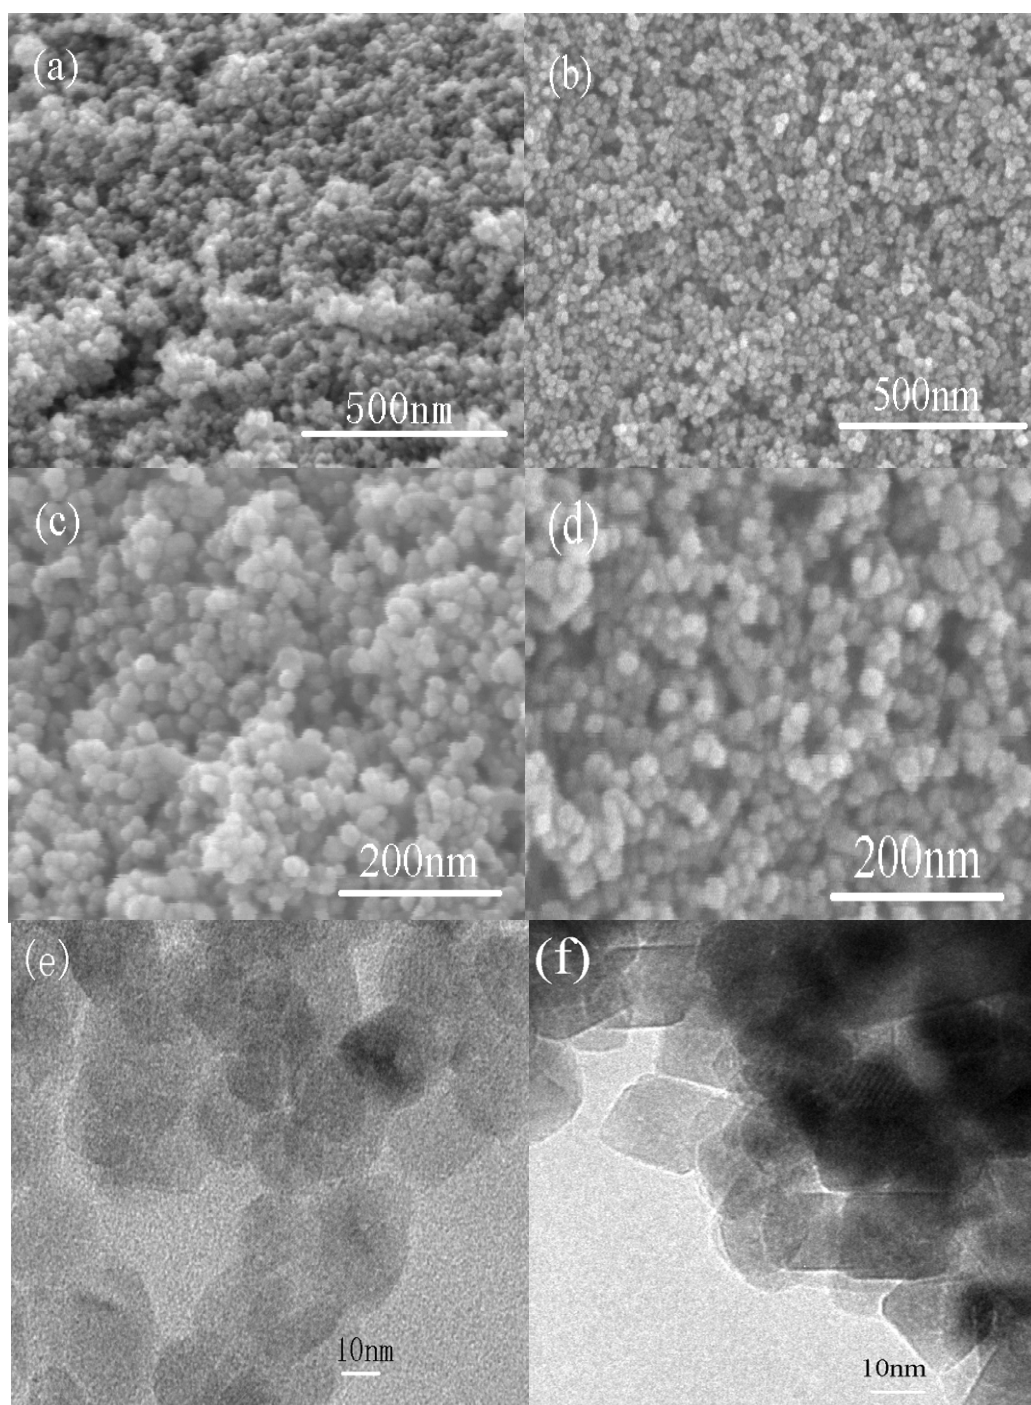

Fig.S.1. FE-SEM and HRTEM micrographs of the undoped and N,B codoped titania films. (a), (c), (e) undoped titania films; (b), (d), (f) N,B codoped titania films.

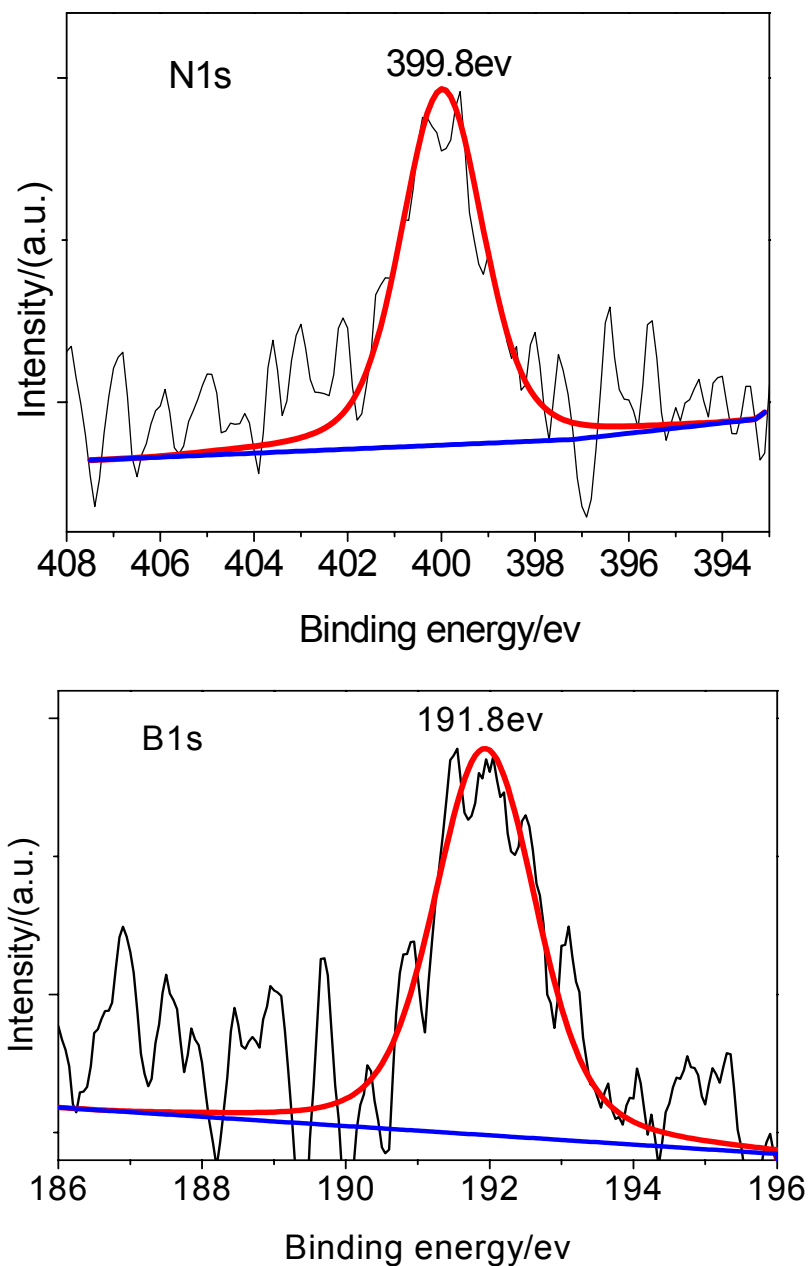

Fig.S.2. N 1s, B1s XPS spectrum of N,B codoped titania powder, showing that the binding energy of the N 1s, B1s peak centered at 399.8eV, 191.8eV eV, respectively. (0.43 at.% N, 0.51 at.% B)

Table S.1 Performances of the solar cells based on undoped and N,B codoped TiO<sub>2</sub> electrodes.

| L/ $\mu\text{m}$        | DSC           | V <sub>oc</sub><br>[mV] | J <sub>sc</sub><br>[mA/cm <sup>2</sup> ] | FF<br>[%] | $\eta$<br>[%] |
|-------------------------|---------------|-------------------------|------------------------------------------|-----------|---------------|
| 13.4<br>(undoped)       | undoped       | 771                     | 14.04                                    | 74        | 8.0           |
| 13.0<br>(N,B codoped-1) | N,B codoped-1 | 823                     | 13.76                                    | 74        | 8.4           |
| 12.8<br>(N,B codoped-2) | N,B codoped-2 | 792                     | 14.67                                    | 70        | 8.1           |

Table S.2. Properties of the undoped and N,B codoped TiO<sub>2</sub> in the DSCs

| Type of pastes | Crystallite size (nm) | BET<br>Surface area(m <sup>2</sup> /g) |
|----------------|-----------------------|----------------------------------------|
| undoped        | 15.3                  | 82.4                                   |
| N,B codoped-1  | 17.5                  | 74.6                                   |
| N,B codoped-2  | 17.1                  | 76.6                                   |

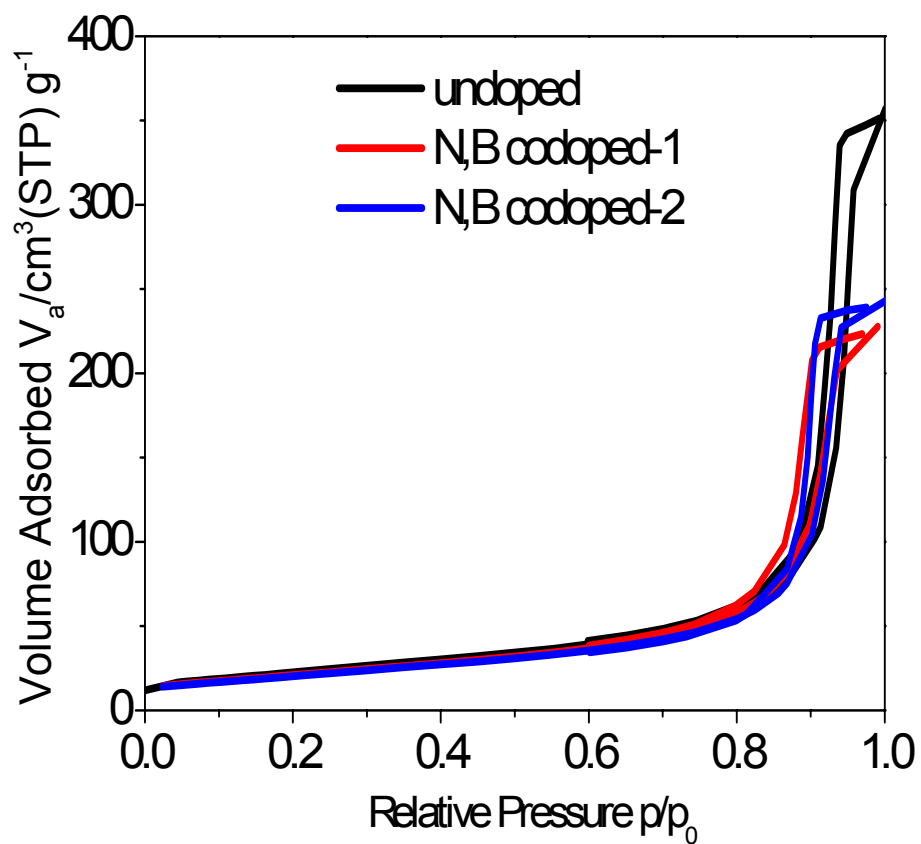

Fig. S.3. N<sub>2</sub> sorption curve of undoped and N,B codoped mesoporous TiO<sub>2</sub> powder



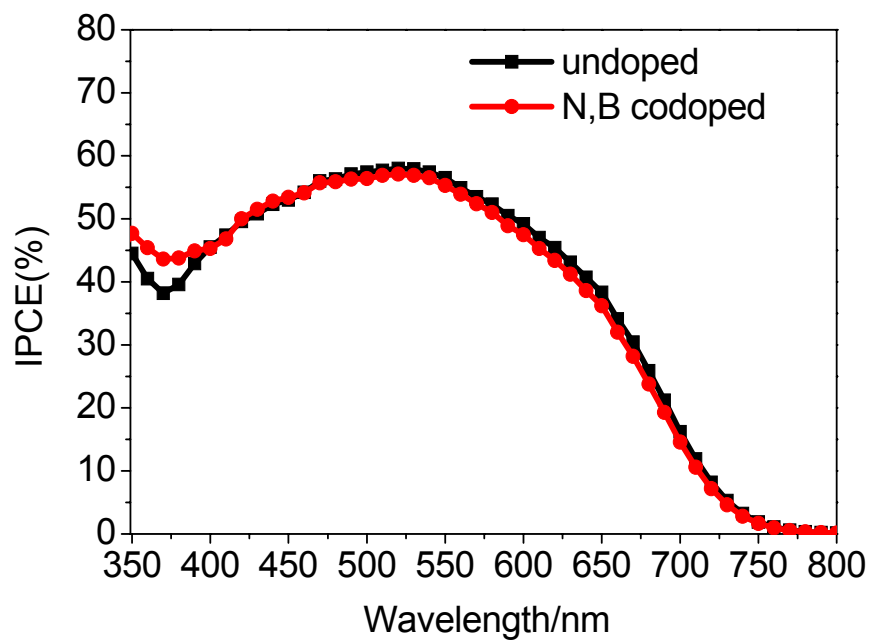

Fig.S.4. Action spectra of the dye-sensitized solar cells based on undoped and N,B codoped TiO<sub>2</sub> electrodes(0.43 at.% N, 0.51 at.% B ).

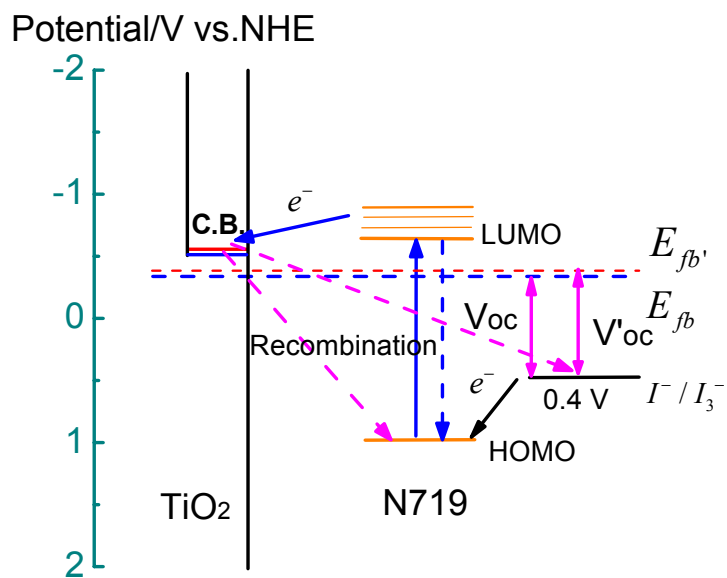

Fig.S.5. Schematic energy diagram for DSCs based on N719 as the photosensitizer, undoped TiO<sub>2</sub> electrode/N,B codoped TiO<sub>2</sub> electrode, and the I<sup>-</sup>/I<sub>3</sub><sup>-</sup> redox electrolyte.
